# Supplementary material
Source: Springer Nature journal article supplement (https://www.springermedizin.de/resource/supplementary/12885_2012_4148_MOESM4_ESM.pdf/9465606)
Supplement: MOESM4 [file 9465606]

| <b>Gene Symbol</b> | <b>FoldChange</b> | <b>FoldChange Description</b> | <b>Gene Symbol</b> | <b>FoldChange</b> | <b>FoldChange Description</b> |
|--------------------|-------------------|-------------------------------|--------------------|-------------------|-------------------------------|
| <b>ABCA10</b>      | 1.94              | FaDu 10b down vs FaDu Control | <b>ACMSD</b>       | 3.11              | FaDu 10b up vs FaDu Control   |
| <b>ACTN2</b>       | 2.15              | FaDu 10b down vs FaDu Control | <b>ADCY2</b>       | 2.44              | FaDu 10b up vs FaDu Control   |
| <b>ADAMTS12</b>    | 3.41              | FaDu 10b down vs FaDu Control | <b>ADCYAP1</b>     | 2.67              | FaDu 10b up vs FaDu Control   |
| <b>ADRA2B</b>      | 2.07              | FaDu 10b down vs FaDu Control | <b>ANKRD6</b>      | 2.06              | FaDu 10b up vs FaDu Control   |
| <b>AGBL3</b>       | 3.37              | FaDu 10b down vs FaDu Control | <b>AOX2P</b>       | 2.21              | FaDu 10b up vs FaDu Control   |
| <b>AGMO</b>        | 2.28              | FaDu 10b down vs FaDu Control | <b>ARHGEF38</b>    | 1.93              | FaDu 10b up vs FaDu Control   |
| <b>AK022341</b>    | 1.95              | FaDu 10b down vs FaDu Control | <b>ASIP</b>        | 5.80              | FaDu 10b up vs FaDu Control   |
| <b>AK095699</b>    | 22.75             | FaDu 10b down vs FaDu Control | <b>ATP6V0D2</b>    | 1.98              | FaDu 10b up vs FaDu Control   |
| <b>AK123491</b>    | 2.57              | FaDu 10b down vs FaDu Control | <b>CACNA2D3</b>    | 2.31              | FaDu 10b up vs FaDu Control   |
| <b>AKR1CL1</b>     | 2.51              | FaDu 10b down vs FaDu Control | <b>CD675678</b>    | 2.01              | FaDu 10b up vs FaDu Control   |
| <b>AL582488</b>    | 2.21              | FaDu 10b down vs FaDu Control | <b>CHIC1</b>       | 2.05              | FaDu 10b up vs FaDu Control   |
| <b>ALOX15B</b>     | 2.05              | FaDu 10b down vs FaDu Control | <b>CHRNA1</b>      | 1.95              | FaDu 10b up vs FaDu Control   |
| <b>ANKK1</b>       | 2.06              | FaDu 10b down vs FaDu Control | <b>CHRNA2</b>      | 2.97              | FaDu 10b up vs FaDu Control   |
| <b>ANKRD33B</b>    | 2.01              | FaDu 10b down vs FaDu Control | <b>CKM</b>         | 2.29              | FaDu 10b up vs FaDu Control   |
| <b>ANO1</b>        | 8.65              | FaDu 10b down vs FaDu Control | <b>CKMT2</b>       | 2.06              | FaDu 10b up vs FaDu Control   |
| <b>APOBEC3D</b>    | 3.85              | FaDu 10b down vs FaDu Control | <b>CLC</b>         | 2.63              | FaDu 10b up vs FaDu Control   |
| <b>ARMC2</b>       | 2.17              | FaDu 10b down vs FaDu Control | <b>CLEC4G</b>      | 1.91              | FaDu 10b up vs FaDu Control   |
| <b>ASB11</b>       | 2.50              | FaDu 10b down vs FaDu Control | <b>CLPS</b>        | 2.23              | FaDu 10b up vs FaDu Control   |
| <b>ASB18</b>       | 7.98              | FaDu 10b down vs FaDu Control | <b>CPA3</b>        | 1.97              | FaDu 10b up vs FaDu Control   |
| <b>ATP12A</b>      | 2.13              | FaDu 10b down vs FaDu Control | <b>CPNE9</b>       | 1.96              | FaDu 10b up vs FaDu Control   |
| <b>ATP1B2</b>      | 2.35              | FaDu 10b down vs FaDu Control | <b>CPS1-IT1</b>    | 2.29              | FaDu 10b up vs FaDu Control   |
| <b>ATP2B1</b>      | 3.73              | FaDu 10b down vs FaDu Control | <b>CR1L</b>        | 2.27              | FaDu 10b up vs FaDu Control   |
| <b>BE782190</b>    | 2.67              | FaDu 10b down vs FaDu Control | <b>CSRNP3</b>      | 1.98              | FaDu 10b up vs FaDu Control   |

|                 |      |                               |                 |        |                             |
|-----------------|------|-------------------------------|-----------------|--------|-----------------------------|
| <b>BI056255</b> | 2.42 | FaDu 10b down vs FaDu Control | CSTT            | 3.19   | FaDu 10b up vs FaDu Control |
| <b>BM981407</b> | 2.41 | FaDu 10b down vs FaDu Control | CTSL3           | 5.88   | FaDu 10b up vs FaDu Control |
| <b>BPI</b>      | 2.30 | FaDu 10b down vs FaDu Control | CXCR2P1         | 4.99   | FaDu 10b up vs FaDu Control |
| <b>C1QTNF8</b>  | 1.98 | FaDu 10b down vs FaDu Control | CYP2G1P         | 2.63   | FaDu 10b up vs FaDu Control |
| <b>CACNG8</b>   | 3.25 | FaDu 10b down vs FaDu Control | CYP4F12         | 3.79   | FaDu 10b up vs FaDu Control |
| <b>CAMK2B</b>   | 3.62 | FaDu 10b down vs FaDu Control | CYP4F22         | 1.94   | FaDu 10b up vs FaDu Control |
| <b>CCDC158</b>  | 2.02 | FaDu 10b down vs FaDu Control | DEFA10P         | 4.33   | FaDu 10b up vs FaDu Control |
| <b>CCDC19</b>   | 2.86 | FaDu 10b down vs FaDu Control | DEFB105B        | 2.43   | FaDu 10b up vs FaDu Control |
| <b>CCRL1</b>    | 2.28 | FaDu 10b down vs FaDu Control | DEFB123         | 4.47   | FaDu 10b up vs FaDu Control |
| <b>CD180</b>    | 3.95 | FaDu 10b down vs FaDu Control | DGAT2L6         | 2.44   | FaDu 10b up vs FaDu Control |
| <b>CD22</b>     | 3.43 | FaDu 10b down vs FaDu Control | DGCR5           | 2.42   | FaDu 10b up vs FaDu Control |
| <b>CDR1</b>     | 6.51 | FaDu 10b down vs FaDu Control | DIO3OS          | 2.09   | FaDu 10b up vs FaDu Control |
| <b>CHST5</b>    | 2.94 | FaDu 10b down vs FaDu Control | DPP10           | 2.16   | FaDu 10b up vs FaDu Control |
| <b>CLTC</b>     | 6.96 | FaDu 10b down vs FaDu Control | EPYC            | 2.08   | FaDu 10b up vs FaDu Control |
| <b>CNDP1</b>    | 2.13 | FaDu 10b down vs FaDu Control | ERP27           | 1.91   | FaDu 10b up vs FaDu Control |
| <b>CNIH2</b>    | 2.01 | FaDu 10b down vs FaDu Control | ESAM            | 2.48   | FaDu 10b up vs FaDu Control |
| <b>CNTF</b>     | 2.61 | FaDu 10b down vs FaDu Control | ETG05_660<br>23 | 125.46 | FaDu 10b up vs FaDu Control |
| <b>CNTN6</b>    | 2.12 | FaDu 10b down vs FaDu Control | FABP4           | 2.19   | FaDu 10b up vs FaDu Control |
| <b>CRYGA</b>    | 2.01 | FaDu 10b down vs FaDu Control | FAM19A4         | 2.06   | FaDu 10b up vs FaDu Control |
| <b>CYS1</b>     | 2.42 | FaDu 10b down vs FaDu Control | FAM99B          | 2.59   | FaDu 10b up vs FaDu Control |
| <b>DA717721</b> | 2.35 | FaDu 10b down vs FaDu Control | FIGF            | 2.69   | FaDu 10b up vs FaDu Control |
| <b>DNAH1</b>    | 3.34 | FaDu 10b down vs FaDu Control | FLJ20712        | 2.00   | FaDu 10b up vs FaDu Control |
| <b>DNASE1L3</b> | 2.10 | FaDu 10b down vs FaDu Control | FLJ39639        | 4.57   | FaDu 10b up vs FaDu Control |
| <b>DUSP27</b>   | 5.87 | FaDu 10b down vs FaDu Control | FPR2            | 3.08   | FaDu 10b up vs FaDu Control |

|                 |      |                               |          |      |                             |
|-----------------|------|-------------------------------|----------|------|-----------------------------|
| <b>EFCAB1</b>   | 8.93 | FaDu 10b down vs FaDu Control | FRG2B    | 3.25 | FaDu 10b up vs FaDu Control |
| <b>EFCAB9</b>   | 2.27 | FaDu 10b down vs FaDu Control | FSD2     | 2.03 | FaDu 10b up vs FaDu Control |
| <b>EFNA2</b>    | 1.98 | FaDu 10b down vs FaDu Control | GABRA3   | 2.35 | FaDu 10b up vs FaDu Control |
| <b>EFNA5</b>    | 2.45 | FaDu 10b down vs FaDu Control | GHRH     | 2.00 | FaDu 10b up vs FaDu Control |
| <b>EGFLAM</b>   | 2.20 | FaDu 10b down vs FaDu Control | GHRLOS2  | 2.19 | FaDu 10b up vs FaDu Control |
| <b>ESRRG</b>    | 1.97 | FaDu 10b down vs FaDu Control | GJD3     | 5.03 | FaDu 10b up vs FaDu Control |
| <b>ETV5</b>     | 2.05 | FaDu 10b down vs FaDu Control | GPLD1    | 2.05 | FaDu 10b up vs FaDu Control |
| <b>ETV7</b>     | 2.61 | FaDu 10b down vs FaDu Control | GPR153   | 1.94 | FaDu 10b up vs FaDu Control |
| <b>EXOC3L1</b>  | 2.79 | FaDu 10b down vs FaDu Control | GPR22    | 3.17 | FaDu 10b up vs FaDu Control |
| <b>FAM101A</b>  | 1.96 | FaDu 10b down vs FaDu Control | GPR50    | 2.99 | FaDu 10b up vs FaDu Control |
| <b>FAM13AOS</b> | 2.00 | FaDu 10b down vs FaDu Control | GPR63    | 2.14 | FaDu 10b up vs FaDu Control |
| <b>FAM3D</b>    | 2.88 | FaDu 10b down vs FaDu Control | GPRIN3   | 3.63 | FaDu 10b up vs FaDu Control |
| <b>FAM48B1</b>  | 2.37 | FaDu 10b down vs FaDu Control | GRIN3A   | 5.08 | FaDu 10b up vs FaDu Control |
| <b>FAM48B2</b>  | 2.16 | FaDu 10b down vs FaDu Control | GRM8     | 1.97 | FaDu 10b up vs FaDu Control |
| <b>FCER1A</b>   | 1.95 | FaDu 10b down vs FaDu Control | GSTTP1   | 3.30 | FaDu 10b up vs FaDu Control |
| <b>FLJ16124</b> | 2.21 | FaDu 10b down vs FaDu Control | HAR1B    | 2.05 | FaDu 10b up vs FaDu Control |
| <b>FLJ35409</b> | 3.05 | FaDu 10b down vs FaDu Control | HDX      | 2.87 | FaDu 10b up vs FaDu Control |
| <b>FLJ41278</b> | 2.46 | FaDu 10b down vs FaDu Control | HLA-DRB6 | 4.49 | FaDu 10b up vs FaDu Control |
| <b>FLJ41649</b> | 2.16 | FaDu 10b down vs FaDu Control | HOXC12   | 4.15 | FaDu 10b up vs FaDu Control |
| <b>FLJ44511</b> | 1.91 | FaDu 10b down vs FaDu Control | HPVC1    | 2.30 | FaDu 10b up vs FaDu Control |
| <b>FLJ45513</b> | 1.92 | FaDu 10b down vs FaDu Control | HSD3B2   | 6.85 | FaDu 10b up vs FaDu Control |
| <b>FOXP4</b>    | 2.83 | FaDu 10b down vs FaDu Control | HTR3E    | 2.08 | FaDu 10b up vs FaDu Control |
| <b>FSIP1</b>    | 2.07 | FaDu 10b down vs FaDu Control | IFNA21   | 2.25 | FaDu 10b up vs FaDu Control |
| <b>GALNT4</b>   | 2.53 | FaDu 10b down vs FaDu Control | IFNA4    | 2.08 | FaDu 10b up vs FaDu Control |
| <b>GFRA4</b>    | 3.65 | FaDu 10b down vs FaDu Control | IL1A     | 2.20 | FaDu 10b up vs FaDu Control |

|                  |       |                               |           |       |                             |
|------------------|-------|-------------------------------|-----------|-------|-----------------------------|
| <b>GIMAP8</b>    | 2.61  | FaDu 10b down vs FaDu Control | IPMK      | 3.12  | FaDu 10b up vs FaDu Control |
| <b>GJC3</b>      | 2.54  | FaDu 10b down vs FaDu Control | IRGQ      | 2.09  | FaDu 10b up vs FaDu Control |
| <b>GK2</b>       | 13.03 | FaDu 10b down vs FaDu Control | KCNQ4     | 1.94  | FaDu 10b up vs FaDu Control |
| <b>GLYATL2</b>   | 1.95  | FaDu 10b down vs FaDu Control | KCNQ5     | 2.90  | FaDu 10b up vs FaDu Control |
| <b>GML</b>       | 1.97  | FaDu 10b down vs FaDu Control | KCNT2     | 3.07  | FaDu 10b up vs FaDu Control |
| <b>GOLGA7B</b>   | 2.00  | FaDu 10b down vs FaDu Control | KIAA1524  | 2.21  | FaDu 10b up vs FaDu Control |
| <b>GPR142</b>    | 1.99  | FaDu 10b down vs FaDu Control | KLHL1     | 4.23  | FaDu 10b up vs FaDu Control |
| <b>GPR31</b>     | 2.19  | FaDu 10b down vs FaDu Control | KLK7      | 8.75  | FaDu 10b up vs FaDu Control |
| <b>GSTA2</b>     | 2.12  | FaDu 10b down vs FaDu Control | KRT25     | 3.91  | FaDu 10b up vs FaDu Control |
| <b>GUCA1C</b>    | 2.16  | FaDu 10b down vs FaDu Control | KRTAP12-1 | 2.60  | FaDu 10b up vs FaDu Control |
| <b>HEPN1</b>     | 2.08  | FaDu 10b down vs FaDu Control | KRTAP27-1 | 13.96 | FaDu 10b up vs FaDu Control |
| <b>HFM1</b>      | 2.10  | FaDu 10b down vs FaDu Control | KRTAP5-3  | 2.97  | FaDu 10b up vs FaDu Control |
| <b>HTN1</b>      | 2.58  | FaDu 10b down vs FaDu Control | KRTAP7-1  | 11.51 | FaDu 10b up vs FaDu Control |
| <b>IFNA2</b>     | 3.44  | FaDu 10b down vs FaDu Control | KRTAP9-8  | 7.57  | FaDu 10b up vs FaDu Control |
| <b>IL17RE</b>    | 1.94  | FaDu 10b down vs FaDu Control | KSR1      | 3.62  | FaDu 10b up vs FaDu Control |
| <b>IPW</b>       | 1.96  | FaDu 10b down vs FaDu Control | KSR2      | 2.40  | FaDu 10b up vs FaDu Control |
| <b>IVL</b>       | 2.76  | FaDu 10b down vs FaDu Control | LCE3B     | 1.91  | FaDu 10b up vs FaDu Control |
| <b>KCNIP2</b>    | 5.82  | FaDu 10b down vs FaDu Control | LCE6A     | 2.55  | FaDu 10b up vs FaDu Control |
| <b>KCNK10</b>    | 2.03  | FaDu 10b down vs FaDu Control | LHFPL3    | 1.94  | FaDu 10b up vs FaDu Control |
| <b>KCTD13</b>    | 2.15  | FaDu 10b down vs FaDu Control | LMO2      | 4.33  | FaDu 10b up vs FaDu Control |
| <b>KIR3DL3</b>   | 2.00  | FaDu 10b down vs FaDu Control | LPAR5     | 1.98  | FaDu 10b up vs FaDu Control |
| <b>KLK4</b>      | 2.15  | FaDu 10b down vs FaDu Control | LRP1B     | 2.89  | FaDu 10b up vs FaDu Control |
| <b>KRTAP13-4</b> | 2.04  | FaDu 10b down vs FaDu Control | MAP2      | 2.25  | FaDu 10b up vs FaDu Control |
| <b>LAIR2</b>     | 2.03  | FaDu 10b down vs FaDu Control | MATN4     | 2.46  | FaDu 10b up vs FaDu Control |
| <b>LANCL2</b>    | 1.92  | FaDu 10b down vs FaDu Control | MGC57346  | 1.92  | FaDu 10b up vs FaDu Control |

|                  |       |                               |          |       |                             |
|------------------|-------|-------------------------------|----------|-------|-----------------------------|
| <b>LCE3D</b>     | 2.94  | FaDu 10b down vs FaDu Control | NAALAD2  | 1.93  | FaDu 10b up vs FaDu Control |
| <b>LRP11</b>     | 2.62  | FaDu 10b down vs FaDu Control | NALCN    | 2.23  | FaDu 10b up vs FaDu Control |
| <b>LRRN4</b>     | 2.47  | FaDu 10b down vs FaDu Control | NAV2-AS4 | 3.88  | FaDu 10b up vs FaDu Control |
| <b>MAMDC2</b>    | 3.77  | FaDu 10b down vs FaDu Control | NHLH1    | 4.12  | FaDu 10b up vs FaDu Control |
| <b>MAPRE3</b>    | 2.55  | FaDu 10b down vs FaDu Control | NHLRC1   | 2.53  | FaDu 10b up vs FaDu Control |
| <b>MEFV</b>      | 2.12  | FaDu 10b down vs FaDu Control | NLGN4Y   | 3.47  | FaDu 10b up vs FaDu Control |
| <b>METTL11B</b>  | 1.92  | FaDu 10b down vs FaDu Control | NP511102 | 2.18  | FaDu 10b up vs FaDu Control |
| <b>MGAT5</b>     | 2.11  | FaDu 10b down vs FaDu Control | NR3C2    | 4.85  | FaDu 10b up vs FaDu Control |
| <b>MIR155HG</b>  | 1.97  | FaDu 10b down vs FaDu Control | NRAP     | 2.20  | FaDu 10b up vs FaDu Control |
| <b>MTMR8</b>     | 2.09  | FaDu 10b down vs FaDu Control | ODF3L1   | 4.49  | FaDu 10b up vs FaDu Control |
| <b>MYH7</b>      | 2.26  | FaDu 10b down vs FaDu Control | OR1B1    | 2.44  | FaDu 10b up vs FaDu Control |
| <b>NCAPH</b>     | 2.50  | FaDu 10b down vs FaDu Control | OR2K2    | 3.24  | FaDu 10b up vs FaDu Control |
| <b>NFATC2</b>    | 1.98  | FaDu 10b down vs FaDu Control | OR2L3    | 2.09  | FaDu 10b up vs FaDu Control |
| <b>NP1245771</b> | 10.09 | FaDu 10b down vs FaDu Control | OR3A1    | 1.95  | FaDu 10b up vs FaDu Control |
| <b>O3FAR1</b>    | 2.27  | FaDu 10b down vs FaDu Control | OR51I2   | 2.10  | FaDu 10b up vs FaDu Control |
| <b>OLFML2B</b>   | 2.00  | FaDu 10b down vs FaDu Control | OR52E4   | 6.98  | FaDu 10b up vs FaDu Control |
| <b>OPN1SW</b>    | 2.44  | FaDu 10b down vs FaDu Control | OR52L1   | 3.40  | FaDu 10b up vs FaDu Control |
| <b>OR10T2</b>    | 7.71  | FaDu 10b down vs FaDu Control | OR5A2    | 2.90  | FaDu 10b up vs FaDu Control |
| <b>OR4C15</b>    | 2.06  | FaDu 10b down vs FaDu Control | OR5K4    | 5.22  | FaDu 10b up vs FaDu Control |
| <b>OR51E1</b>    | 1.92  | FaDu 10b down vs FaDu Control | OR6B2    | 12.26 | FaDu 10b up vs FaDu Control |
| <b>OR51M1</b>    | 4.68  | FaDu 10b down vs FaDu Control | OR8U1    | 2.61  | FaDu 10b up vs FaDu Control |
| <b>OR52E6</b>    | 2.85  | FaDu 10b down vs FaDu Control | PALM2    | 1.93  | FaDu 10b up vs FaDu Control |
| <b>OR52N4</b>    | 8.17  | FaDu 10b down vs FaDu Control | PAX4     | 1.94  | FaDu 10b up vs FaDu Control |
| <b>OR6T1</b>     | 2.82  | FaDu 10b down vs FaDu Control | PCYT1B   | 2.31  | FaDu 10b up vs FaDu Control |
| <b>OR8K5</b>     | 5.27  | FaDu 10b down vs FaDu Control | PDC      | 2.27  | FaDu 10b up vs FaDu Control |

|                 |      |                               |          |        |                             |
|-----------------|------|-------------------------------|----------|--------|-----------------------------|
| <b>P2RX3</b>    | 2.08 | FaDu 10b down vs FaDu Control | PHGR1    | 4.16   | FaDu 10b up vs FaDu Control |
| <b>PCDHGA5</b>  | 2.80 | FaDu 10b down vs FaDu Control | PRAMEF13 | 2.37   | FaDu 10b up vs FaDu Control |
| <b>PEAR1</b>    | 5.73 | FaDu 10b down vs FaDu Control | PRG4     | 12.71  | FaDu 10b up vs FaDu Control |
| <b>PENK</b>     | 2.16 | FaDu 10b down vs FaDu Control | PRR9     | 2.22   | FaDu 10b up vs FaDu Control |
| <b>PIK3C2G</b>  | 1.92 | FaDu 10b down vs FaDu Control | RAB43P1  | 2.01   | FaDu 10b up vs FaDu Control |
| <b>PIP5K1P1</b> | 3.44 | FaDu 10b down vs FaDu Control | RAD21L1  | 2.11   | FaDu 10b up vs FaDu Control |
| <b>PNLIP</b>    | 3.02 | FaDu 10b down vs FaDu Control | RASSF3   | 2.35   | FaDu 10b up vs FaDu Control |
| <b>RAP1GAP</b>  | 2.17 | FaDu 10b down vs FaDu Control | RBMXL2   | 4.94   | FaDu 10b up vs FaDu Control |
| <b>RAX</b>      | 2.92 | FaDu 10b down vs FaDu Control | RBP3     | 5.75   | FaDu 10b up vs FaDu Control |
| <b>RLN2</b>     | 2.08 | FaDu 10b down vs FaDu Control | RNF152   | 2.15   | FaDu 10b up vs FaDu Control |
| <b>RPGRIP1L</b> | 1.92 | FaDu 10b down vs FaDu Control | RNF186   | 3.97   | FaDu 10b up vs FaDu Control |
| <b>SCN1A</b>    | 2.79 | FaDu 10b down vs FaDu Control | RXFP1    | 2.41   | FaDu 10b up vs FaDu Control |
| <b>SDR9C7</b>   | 6.30 | FaDu 10b down vs FaDu Control | RYR1     | 2.73   | FaDu 10b up vs FaDu Control |
| <b>SIRPG</b>    | 1.97 | FaDu 10b down vs FaDu Control | SCGB1D2  | 2.24   | FaDu 10b up vs FaDu Control |
| <b>SLC34A2</b>  | 5.04 | FaDu 10b down vs FaDu Control | SGCA     | 5.69   | FaDu 10b up vs FaDu Control |
| <b>SLIT2</b>    | 1.91 | FaDu 10b down vs FaDu Control | SGK196   | 3.46   | FaDu 10b up vs FaDu Control |
| <b>SMPX</b>     | 2.16 | FaDu 10b down vs FaDu Control | SIM1     | 2.00   | FaDu 10b up vs FaDu Control |
| <b>SMR3A</b>    | 1.99 | FaDu 10b down vs FaDu Control | SLAIN2   | 1.95   | FaDu 10b up vs FaDu Control |
| <b>SPATA4</b>   | 2.75 | FaDu 10b down vs FaDu Control | SLC8A2   | 2.51   | FaDu 10b up vs FaDu Control |
| <b>SPIN3</b>    | 1.94 | FaDu 10b down vs FaDu Control | SPANXN5  | 3.59   | FaDu 10b up vs FaDu Control |
| <b>SSTR5</b>    | 2.29 | FaDu 10b down vs FaDu Control | SPDYE5   | 2.02   | FaDu 10b up vs FaDu Control |
| <b>SSX5</b>     | 2.94 | FaDu 10b down vs FaDu Control | STRA8    | 47.84  | FaDu 10b up vs FaDu Control |
| <b>SYCN</b>     | 2.03 | FaDu 10b down vs FaDu Control | SWT1     | 2.80   | FaDu 10b up vs FaDu Control |
| <b>TECRL</b>    | 2.67 | FaDu 10b down vs FaDu Control | TAS2R46  | 3.92   | FaDu 10b up vs FaDu Control |
| <b>TMEM233</b>  | 6.13 | FaDu 10b down vs FaDu Control | TCF23    | 771.04 | FaDu 10b up vs FaDu Control |

|                |       |                               |         |      |                             |
|----------------|-------|-------------------------------|---------|------|-----------------------------|
| <b>TNNT3</b>   | 1.92  | FaDu 10b down vs FaDu Control | TDRD6   | 2.63 | FaDu 10b up vs FaDu Control |
| <b>TRIM78P</b> | 2.06  | FaDu 10b down vs FaDu Control | TDRG1   | 6.33 | FaDu 10b up vs FaDu Control |
| <b>TSSK2</b>   | 2.91  | FaDu 10b down vs FaDu Control | THEM5   | 2.13 | FaDu 10b up vs FaDu Control |
| <b>TYRO3P</b>  | 11.01 | FaDu 10b down vs FaDu Control | TM4SF4  | 3.25 | FaDu 10b up vs FaDu Control |
| <b>UAP1L1</b>  | 2.82  | FaDu 10b down vs FaDu Control | TMEM114 | 2.03 | FaDu 10b up vs FaDu Control |
| <b>UPK3A</b>   | 2.29  | FaDu 10b down vs FaDu Control | TMEM74  | 2.35 | FaDu 10b up vs FaDu Control |
| <b>VSIG2</b>   | 2.08  | FaDu 10b down vs FaDu Control | TMIE    | 5.00 | FaDu 10b up vs FaDu Control |
| <b>ZBTB12</b>  | 1.94  | FaDu 10b down vs FaDu Control | TREH    | 2.04 | FaDu 10b up vs FaDu Control |
| <b>ZC3H8</b>   | 2.10  | FaDu 10b down vs FaDu Control | TTC9    | 3.21 | FaDu 10b up vs FaDu Control |
| <b>ZCCHC12</b> | 7.63  | FaDu 10b down vs FaDu Control | TTC9B   | 2.00 | FaDu 10b up vs FaDu Control |
| <b>ZNF132</b>  | 3.49  | FaDu 10b down vs FaDu Control | USP29   | 2.52 | FaDu 10b up vs FaDu Control |
| <b>ZNF560</b>  | 2.25  | FaDu 10b down vs FaDu Control | WNT7A   | 3.10 | FaDu 10b up vs FaDu Control |
| <b>ZNF630</b>  | 3.05  | FaDu 10b down vs FaDu Control | XKR5    | 2.92 | FaDu 10b up vs FaDu Control |
| <b>ZNF699</b>  | 8.18  | FaDu 10b down vs FaDu Control | XPNPEP3 | 2.99 | FaDu 10b up vs FaDu Control |
|                |       |                               | YIPF7   | 5.34 | FaDu 10b up vs FaDu Control |
|                |       |                               | YME1L1  | 2.10 | FaDu 10b up vs FaDu Control |
|                |       |                               | Z39353  | 2.37 | FaDu 10b up vs FaDu Control |
|                |       |                               | ZNF41   | 2.09 | FaDu 10b up vs FaDu Control |
|                |       |                               | ZNF554  | 3.09 | FaDu 10b up vs FaDu Control |
|                |       |                               | ZNF702P | 2.19 | FaDu 10b up vs FaDu Control |
|                |       |                               | ZNF785  | 2.59 | FaDu 10b up vs FaDu Control |
|                |       |                               | ZNF879  | 1.98 | FaDu 10b up vs FaDu Control |
